# Supplementary material
Source: publisher figshare collection journal article supplement (https://geolsoc.figshare.com/ndownloader/files/5427173)
Supplement: Supplementary file 1 [file 5427173]

"Supplementary Table U-Pb zircon (SIMS) data for the Doonamo Formation, Erris Group (Clasts C61B-1, C61B-10, C61D-30 and C61G-7 and detrital sample, C61A), and the Inishkea Division (detrital samples C63 and C67). ",,,,,,,,,,,,,,,,,,,,
,,,,,,,,,,,,,,,,,,,,
,,,,,,,,,,,,,,,,,,,,
spot,Description,,[U],[Th],[Pb],Th/U,f206%,206Pb,238U,±2s,207Pb,±2s,% disc,207Pb,±2s,206Pb,±2s,Conc. ,±2s,
#,,,ppm,ppm,ppm,meas,,204Pb,206Pb,%,206Pb,%,,206Pb,,238U,,age ,,
"C61B-1, K-feldspar clast, Doonamo Formation, Erris Group, Spinkadoon",,,,,,,,,,,,,,,,,,,,
1,,"p, srp, oz, 160, 70",416,118,156,0.284,{0.02},103853,3.184,1.66,0.1067,0.73,-1.01,1743,13,1761,26,1747,12,
1b,rep,"p, srp, oz, 160, 70",416,110,153,0.263,{0.01},261196,3.219,1.96,0.1066,0.61,-0.16,1741,11,1744,30,1742,11,
4a,,"p, srp, oz, 82, 56",673,169,246,0.250,0.2,9564,3.227,1.67,0.1069,0.57,0.35,1746,10,1740,25,1746,10,
5a,c,"p, srap, oz, 230, 48",1352,600,522,0.444,{0.04},49858,3.200,1.69,0.1063,0.42,-0.94,1736,8,1753,26,1738,8,
6,,"p, srp, oz, 135, 55",752,99,263,0.131,{0.03},58158,3.269,1.68,0.1065,0.52,1.10,1740,9,1720,25,1737,9,
6b,rep,"p, srp, oz, 135, 55",604,146,222,0.241,{0.01},191854,3.208,1.96,0.1068,0.74,-0.22,1746,14,1749,30,1746,12,
10,rim?,"srp, oz, 195, 110",812,258,299,0.318,{0.04},48177,3.225,2.47,0.1073,0.94,0.77,1754,17,1741,38,1752,16,
12a,c,"b, srp, oz, 232, 108",930,378,353,0.406,0.77,2421,3.185,2.48,0.1074,0.83,-0.30,1755,15,1760,38,1756,14,
"Concordia Age = 1743.0 ± 3.7 Ma (MSWD of concordance = 0.27, Probability of concordance = 0.60)",,,,,,,,,,,,,,,,,,,,
discordant data,,,,,,,,,,,,,,,,,,,,
2a,c,"p, rp, CLd, 195, 66",1733,908,579,0.524,{0.06},29690,3.762,1.96,0.1031,0.36,9.59,1681,7,1519,27,-,-,
2b,rim,"rp, oz, 195, 66",516,119,179,0.231,{0.09},20568,3.380,1.65,0.1068,0.63,4.23,1745,12,1671,24,-,-,
3,rim,"p, srp, oz, 160, 50",1801,253,387,0.141,{0.19},9804,5.242,1.65,0.0905,0.44,21.61,1436,8,1126,17,-,-,
4b,rep,"p, srp, oz, 82, 55",588,177,195,0.301,3.86,485,3.553,1.67,0.1055,4.09,7.23,1723,75,1599,24,-,-,
5b,rim?,"p, srap, oz, 230, 48",334,64,115,0.191,{0.11},17552,3.371,1.64,0.1065,0.78,3.73,1740,14,1675,24,-,-,
7a,c,"p, srp, oz, 170, 70",899,374,302,0.416634619,0.46,4062,3.620,1.83,0.103881986,0.60,7.21,1695,11,1572,25,-,-,
8,rim,"p, sp, oz, 150, 92",1176,213,318,0.181,4.19,447,4.250,2.57,0.1027,8.92,18.63,1674,165,1362,32,-,-,
9,,"p, sr, oz, 115, 60",669,151,163,0.225,1.27,1476,4.808,2.49,0.1061,1.61,29.74,1734,30,1218,28,-,-,
10b,rep,"srp, oz, 195, 110",729,200,258,0.275,{0.04},47341,3.354,1.96,0.1069,0.47,3.73,1747,9,1682,29,-,-,
11, ,"p, sp, oz, 100, 65",1615,1017,549,0.630,2.12,883,3.657,2.50,0.1039,1.13,8.09,1696,21,1558,35,-,-,
,,,,,,,,,,,,,,,,,,,,
"C61G-7, K-feldspar clast, Doonamo Formation, Erris Group, Spinkadoon",,,,,,,,,,,,,,,,,,,,
1a,,"p, bp, oz, 125, 95",247,61,88,0.249,{0.09},20135,3.292,1.66,0.1069,0.98,2.10,1746,18,1710,25,1734,220,
discordant data,,,,,,,,,,,,,,,,,,,,
1b,rep,"p, bp, oz, 125, 95",281,80,110,0.285,{0.01},186801,3.049,1.64,0.1073,0.90,-4.31,1753,16,1829,26,-,-,
,,,,,,,,,,,,,,,,,,,,
,,,,,,,,,,,,,,,,,,,,
,,,,,,,,,,,,,,,,,,,,
,,,,,,,,,,,,,,,,,,,,
Supplementary Table Continued,,,,,,,,,,,,,,,,,,,,
spot,Description,,[U],[Th],[Pb],Th/U,f206%,206Pb,238U,±2s,207Pb,±2s,% disc,207Pb,±2s,206Pb,±2s,Conc. ,±2s,
#,,,ppm,ppm,ppm,meas,,204Pb,206Pb,%,206Pb,%,,206Pb,,238U,,age ,,
"C61B-10, K-feldspar clast, Doonamo Formation, Erris Group, Spinkadoon",,,,,,,,,,,,,,,,,,,,
1,,"p, bp, oz, 96, 65",498,105,179,0.211,{0.02},105940,3.241,1.65,0.1070,0.62,0.85,1749,11,1734,25,1746,10,
1b,rep,"p, bp, oz, 96, 65",624,352,241,0.564,{0.04},42053,3.215,2.99,0.1072,0.88,0.33,1752,16,1746,46,1751,15,
3,,"p, srp, oz, 87, 50",274,62,99,0.227,{0.05},37184,3.263,1.64,0.1074,1.15,1.81,1755,21,1723,25,1742,16,
3b,rep,"p, srp, oz, 87, 50",341,129,125,0.379,{0.03},57033,3.247,2.49,0.1068,1.29,0.86,1746,24,1731,38,1742,20,
6,,"p, pr, oz, 105, 58",376,76,135,0.202,{0.09},21922,3.238,1.67,0.1073,0.72,1.04,1753,13,1735,25,1749,12,
6b,rep,"p, pr, oz, 105, 58",1274,357,454,0.280,0.71,2632,3.336,2.56,0.1063,0.82,2.73,1737,15,1690,38,1731,200,
"Concordia age = 1744.3 ± 5.5 Ma (MSWD of concordance = 9.1, Probability of concordance = 0.003)",,,,,,,,,,,,,,,,,,,,
discordant data,,,,,,,,,,,,,,,,,,,,
2,,"p, srp, z, 110, 60",250,41,86,0.165,0.23,8126,3.349,1.68,0.10673919,1.17,3.46,1744.465734,21.35789829,1684.133547,24.9107319,-,-,
4b,rim,"p, pr, oz, 160, 60",931,253,332,0.272,{0.08},23734,3.326,1.69,0.1061,0.48,2.24,1733,9,1694,25,-,-,
5,,"b, sp, z, 97, 78",680,134,208,0.197,2.27,822,3.804,1.67,0.1063,1.26,13.40,1737,23,1505,22,-,-,
5b,rep,"b, sp, z, 97, 78",1195,444,206,0.371,10.23,183,6.782,2.83,0.0997,2.77,45.21,1618,52,887,23,-,-,
,,,,,,,,,,,,,,,,,,,,
"C61D-30, granitoid clast, Doonamo Formation, Erris Group, Spinkadoon",,,,,,,,,,,,,,,,,,,,
3,,"p, brp, oz, 300, 82",697,0,123,0.001,{0.02},107692,6.049,1.64,0.0713,0.88,-2.23,965,18,986,15,977,11,
3b,rep,"p, brp, oz, 300, 82",3574,3,645,0.001,{0.01},320991,5.939,2.59,0.0715,0.45,-3.20,972,9,1003,24,976,130,
4,,"p, bp, oz, 155, 122",580,2,100,0.003,{0.03},67865,6.215,1.65,0.0709,1.33,-0.65,956,27,962,15,960,13,
4b,rep,"p, bp, oz, 155, 122",1152,16,188,0.014,{0.08},24922,6.562,2.56,0.0705,0.92,2.90,942,19,914,22,930,14,
6,,"b, bp, oz, CLd, 270, 300",3671,8,660,0.002,{0.17},10976,5.989,1.67,0.0721,0.56,-0.64,989,11,995,15,991,9,
discordant data,,,,,,,,,,,,,,,,,,,,
1,,"b, bp, oz, CLd, 250, 260",4629,14,680,0.003,0.82,2271,7.285,1.65,0.0689,0.56,8.06,897,12,829,13,-,-,
2a,,"p, srp, z, 155, 62",3464,3,630,0.001,{0.03},68483,5.891,1.67,0.0716,0.45,-3.74,974,9,1011,16,-,-,
2b,,"p, srp, z, 155, 62",595,1,95,0.002,0.27,7008,6.705,1.66,0.071137499,1.14,9.06,961,23,896,14,-,-,
2c,,"p, brp, oz, 155, 62",3620,3,667,0.001,{0.01},138094,5.820,2.10,0.0716,0.33,-4.80,975,7,1022,20,-,-,
3c,rep,"p, brp, oz, 300, 82",458,1,71,0.002,0.21,8739,6.906,1.98,0.070839101,1.49,10.06,953,30,872,16,-,-,
4c,rep,"p, bp, oz, 155, 122",992,2,159,0.002,0.34,5483,6.697,1.96,0.070671438,0.87,11.06,948,18,897,16,-,-,
5,,"p, r, oz, 78, 66",1544,228,152,0.148,2.81,666,11.176,1.66,0.0733,2.44,47.91,1022,49,552,9,-,-,
7,,"p, sr, oz, 95, 100",3165,14,569,0.005,{0.05},36378,5.972,1.77,0.0713,0.43,-3.43,965,9,998,16,-,-,
,,,,,,,,,,,,,,,,,,,,
,,,,,,,,,,,,,,,,,,,,
,,,,,,,,,,,,,,,,,,,,
Supplementary Table Continued,,,,,,,,,,,,,,,,,,,,
spot,Description,,[U],[Th],[Pb],Th/U,f206%,206Pb,238U,±2s,207Pb,±2s,% disc,207Pb,±2s,206Pb,±2s,Conc. ,±2s,
#,,,ppm,ppm,ppm,meas,,204Pb,206Pb,%,206Pb,%,,206Pb,,238U,,age ,,
"C61A Doonamo Formation, Erris Group, Spinkadoon",,,,,,,,,,,,,,,,,,,,
103,,"p, rp, CLd, 195, 80",807,710,169,0.879,{0.06},31445,6.299,1.96,0.0711,0.77,1.05,960,16,950,17,955,12,
102,,"p, rp, oz, 225, 110",105,25,19,0.240,{0.05},40277,6.221,2.11,0.0713,2.07,0.64,967,42,961,19,962,17,
64,,"p, srp, oz, 220, 110",107,110,24,1.026,{0.14},13839,6.226,1.99,0.0722,1.88,3.16,992,38,960,18,966,16,
29,,"p, srp, oz, 215, 65",100,72,21,0.718,{0.28},6656,6.222,2.48,0.0732,2.66,5.71,1019,54,961,22,969,260,
77,,"sr, CLb, hoz, 160, 90",38,39,8,1.011,{0.23},8079,6.147,1.96,0.0713,3.19,-0.53,966,65,972,18,971,17,
80,,"p, srp, oz, 190, 140",85,59,18,0.691,{0.16},11728,6.097,1.96,0.0706,3.46,-3.52,946,71,979,18,977,17,
75,,"p, srp, oz, 195, 110",80,51,17,0.643,{0.12},15092,6.009,1.96,0.0708,2.17,-4.24,952,44,992,18,986,17,
9,rim,"p, srp, z, 235, 120",99,86,21,0.870,{0.13},14121,6.022,1.65,0.0695,3.52,-8.33,914,72,990,15,987,200,
18,rim,"p, srp, z, 285, 185",98,39,19,0.399,{0.14},13520,6.079,2.48,0.0729,2.22,2.83,1010,45,982,23,987,20,
35,,"p, sr, z, 200, 90",55,31,11,0.568,{0.43},4396,5.999,2.54,0.0727,4.38,1.24,1006,89,994,23,995,23,
1a,rim,"rp, CLb, z, 180, 110",86,5,15,0.054,{0.20},9514,5.979,1.65,0.0730,2.69,1.76,1015,55,997,15,998,15,
1b,c,"rp, oz, 180, 110",99,30,28,0.302,{0.03},55443,4.232,1.74,0.0891,1.94,2.82,1407,37,1367,21,1377,19,
51,c,"p, srp, oz, 135, 105, CLb rim",140,136,32,0.977,{0.08},23050,5.924,2.50,0.0713,2.67,-4.00,967,54,1005,23,999,21,
91,rim,"p, rp, CLb, 190, 130, CLb c",71,53,15,0.738,{0.11},16312,5.991,2.11,0.0733,2.37,2.66,1022,48,995,19,999,18,
10,,"p, srbp, z, 140, 120",148,105,32,0.710,{0.15},12097,5.889,1.67,0.0723,2.69,-1.71,994,55,1011,16,1010,15,
11,rim,"rp, CLb, 180, 100",27,57,8,2.141,{0.52},3621,5.783,1.65,0.0705,6.19,-8.89,944,127,1028,16,1027,16,
31,,"p, rp, oz, 125, 63",92,37,19,0.396,{0.23},8255,5.722,2.47,0.0737,2.67,-0.43,1034,54,1038,24,1038,22,
82,,"p, rp, oz, 120, 75",130,104,29,0.805,{0.06},33840,5.748,1.96,0.0753,1.64,4.08,1078,33,1034,19,1044,240,
70,,"p, srp, z, 200, 115",39,22,9,0.568,{0.31},6017,5.597,2.02,0.0748,2.95,0.34,1063,59,1060,20,1060,19,
8,rim,"r, CLb, 170, 120, oz c",26,8,5,0.303,{0.53},3504,5.560,1.65,0.0713,5.21,-10.50,965,106,1066,16,1063,16,
6,,"p, srp, CLd hoz, 220, 90",361,102,75,0.283,{0.08},22414,5.576,1.64,0.0756,1.34,1.95,1085,27,1063,16,1069,14,
16,rim,"p, r, CLd, 190, 160, sz c",434,157,95,0.363,{0.05},35456,5.388,2.47,0.0754,1.10,-1.72,1079,22,1098,25,1087,17,
32,,"p, brp, CLd, z, 150, 90",942,21,193,0.022,{0.02},79507,5.292,2.49,0.0769,0.81,0.14,1117,16,1116,25,1117,14,
63,,"p, rp, oz, 185, 70",260,89,59,0.343,{0.06},32710,5.186,1.96,0.0776,1.13,-0.11,1135,22,1137,20,1136,15,
92,,"p, srp, oz, 180, 130",68,46,17,0.676,{0.04},50783,4.985,2.01,0.0804,2.25,2.27,1206,44,1178,22,1184,20,
5,c,"p, r, sz, 144, 110, thin rim",27,19,7,0.715,{0.42},4446,4.651,1.69,0.0849,4.46,4.37,1313,87,1255,19,1258,19,
53,,"pb, srp, oz, 125, 110",395,116,100,0.295,{0.03},56982,4.580,2.47,0.0832,1.24,0.01,1273,24,1273,29,1273,18,
50,,"p, srp, oz, 180, 125",54,39,16,0.730,{0.36},5194,4.457,2.47,0.0853,4.05,1.30,1322,78,1305,29,1307,27,
49,,"srbp, z, 160, 90",270,106,78,0.393,{0.05},35753,4.176,2.47,0.0890,1.37,1.47,1405,26,1384,31,1396,20,
26,rim?,"p, r, oz, 150, 125",232,123,72,0.530,{0.09},21333,4.030,2.48,0.0906,1.16,0.73,1439,22,1429,32,1436,18,
100,,"pb, srp,oz, 200, 180",184,63,55,0.342,{0.04},51540,4.005,1.96,0.0923,1.12,2.47,1473,21,1437,25,1458,230,
Supplementary Table Continued,,,,,,,,,,,,,,,,,,,,
spot,Description,,[U],[Th],[Pb],Th/U,f206%,206Pb,238U,±2s,207Pb,±2s,% disc,207Pb,±2s,206Pb,±2s,Conc. ,±2s,
#,,,ppm,ppm,ppm,meas,,204Pb,206Pb,%,206Pb,%,,206Pb,,238U,,age ,,
12,c,"p, srp, z, 270, 125, CLd rim",96,22,28,0.227,{0.02},89692,3.928,2.47,0.0914,2.24,-0.52,1455,43,1462,32,1459,26,
76,,"p, sr, z, 110, 110",131,93,42,0.711,{0.06},33092,3.995,1.97,0.0925,1.25,2.53,1478,24,1440,25,1460,240,
13a,c,"pb, srp, oz, 145, 110",138,53,42,0.382,{0.04},43966,3.959,2.47,0.0936,1.46,3.19,1500,28,1452,32,1479,300,
62,rim,"r, CLd, 165, 120, oz c",500,135,150,0.270,{0.04},48802,3.873,2.47,0.0926,1.24,-0.03,1480,23,1481,33,1480,19,
21a,c,"p, rp, oz, 200,100",211,83,68,0.395,{0.03},70641,3.758,2.50,0.0923,1.13,-3.24,1473,21,1521,34,1487,270,
42,,"pb, r, oz, 220, 175",117,63,38,0.538,{0.13},14872,3.821,2.48,0.0924,1.92,-1.52,1476,36,1498,33,1488,24,
17,,"p, rp, oz, 130, 75",276,103,87,0.372,{0.07},26722,3.804,2.48,0.0928,1.09,-1.42,1484,21,1505,33,1489,18,
98,,"p, r, oz, 130, 150",242,106,76,0.439,{0.03},55225,3.878,1.96,0.0934,0.92,1.18,1496,17,1479,26,1491,14,
40,,"p, rp, oz, 140, 100",144,65,46,0.453,{0.11},17447,3.855,2.47,0.0940,1.76,1.41,1508,33,1487,33,1497,23,
45,,"p, sr, z, 120, 130",275,93,87,0.337,{0.02},107755,3.761,2.48,0.0926,1.59,-2.64,1481,30,1520,34,1498,22,
93,,"p, rp, oz, 140, 80",156,93,51,0.600,{0.07},28183,3.859,1.96,0.0941,1.15,1.67,1511,22,1485,26,1500,17,
15,,"p, r, oz, 120, 90",88,47,29,0.532,{0.18},10449,3.804,2.47,0.0938,1.92,0.00,1505,36,1505,33,1505,24,
38,,"p, srp, oz, CLd, 145, 80",415,134,128,0.324,{0.03},56052,3.866,2.47,0.0942,1.03,1.92,1512,20,1483,33,1505,17,
86,,"p, sr, oz, 120, 130",74,24,24,0.321,{0.08},22552,3.720,4.38,0.0938,3.49,-2.07,1504,66,1535,60,1521,44,
2,rim,"p, rp, CLb, 200, 90, oz c",128,10,40,0.078,{0.07},27183,3.592,1.65,0.0961,1.54,-2.15,1550,29,1583,23,1570,18,
4,,"p, rp, oz, 280, 175",112,73,40,0.652,{0.07},25571,3.607,1.65,0.0982,1.71,0.85,1591,32,1577,23,1582,19,
60,rim,"p, sr, CLb, 120, 120",37,42,14,1.130,{0.27},6836,3.614,2.49,0.0995,3.79,2.52,1615,71,1575,35,1582,31,
99,,"b, pr, CLd, 160, 130",1488,595,512,0.400,{0.01},183553,3.531,2.03,0.0985,0.43,-0.76,1595,8,1608,29,1596,8,
81,,"p, r, oz, 130, 100",110,24,36,0.216,{0.03},64291,3.557,1.97,0.0985,1.41,-0.03,1596,26,1597,28,1597,19,
61,,"p, sr, oz, 140, 118",58,36,21,0.623,{0.36},5187,3.549,2.50,0.0991,2.91,0.40,1607,54,1600,35,1602,30,
46,,"pb, srp, oz, 145, 115",739,864,307,1.169,{0.03},64878,3.467,2.47,0.0992,0.86,-1.47,1610,16,1634,36,1614,15,
84,,"b, srp, oz, 190, 130",195,26,63,0.135,{0.07},28638,3.523,1.96,0.1000,0.94,0.88,1625,17,1611,28,1621,15,
25,,"p, srp, CLb, z, 160, 100",34,20,12,0.608,{0.16},11610,3.504,2.48,0.1006,2.78,1.01,1635,52,1618,35,1624,29,
71,,"p, srp, z, 150, 115",26,9,9,0.339,{0.19},10070,3.493,1.97,0.1004,3.10,0.55,1632,58,1623,28,1625,25,
73,,"p, sr, CLd, z, 125, 115",171,59,58,0.346,{0.18},10182,3.516,1.96,0.1006,1.01,1.34,1636,19,1614,28,1629,16,
7,,"p, srp, oz, 185, 135",248,93,86,0.373,{0.04},49181,3.465,1.65,0.1001,1.14,-0.57,1625,21,1635,24,1630,16,
27,,"pb, srp, CLd, oz, 200, 125",325,101,109,0.311,{0.04},42982,3.547,2.47,0.1007,0.92,2.15,1636,17,1601,35,1630,15,
54,,"p, sr, CLb, z, 150, 95",126,94,48,0.749,{0.12},15502,3.413,2.49,0.0992,1.78,-2.99,1609,33,1657,36,1630,24,
43,,"p, srp, z, 130, 150",73,56,27,0.759,{0.31},6126,3.512,2.48,0.1018,2.30,2.57,1658,43,1615,35,1632,27,
79,,"p, brp, oz, 160, 115",135,66,49,0.490,{0.05},34797,3.446,1.96,0.1003,1.14,-0.76,1630,21,1642,28,1635,17,
96,,"p, srp, z, 175, 100",192,205,77,1.068,{0.04},52710,3.462,2.04,0.1005,0.96,-0.09,1634,18,1636,29,1635,15,
66,,"p, rp, oz, 190, 95",358,114,124,0.318,{0.02},120045,3.449,1.96,0.1006,0.68,-0.39,1635,13,1641,28,1636,12,
101,,"p, rp, oz, 230, 155",90,53,33,0.593,{0.04},53427,3.491,1.97,0.1020,2.01,2.27,1662,37,1624,28,1637,23,
Supplementary Table Continued,,,,,,,,,,,,,,,,,,,,
spot,Description,,[U],[Th],[Pb],Th/U,f206%,206Pb,238U,±2s,207Pb,±2s,% disc,207Pb,±2s,206Pb,±2s,Conc. ,±2s,
#,,,ppm,ppm,ppm,meas,,204Pb,206Pb,%,206Pb,%,,206Pb,,238U,,age ,,
37,rim?,"rp, CLd, 230, 120, oz c",799,77,256,0.097,{0.02},88312,3.518,2.47,0.1008,0.67,1.64,1640,12,1613,35,1637,12,
78,,"p, sr, oz, 150, 90",142,52,50,0.366,{0.04},46417,3.402,2.01,0.1001,1.09,-2.21,1625,20,1661,30,1637,210,
68,,"brp, z, 110, 120",229,260,97,1.136,{0.03},63008,3.380,2.01,0.1004,0.91,-2.40,1631,17,1671,30,1641,220,
69,c,"p, rp, oz, 185, 100, CLd rim",215,140,81,0.650,{0.03},65492,3.441,1.96,0.1009,0.87,-0.23,1641,16,1645,28,1642,14,
19,,"p, srp, sz, 155, 140",132,57,47,0.429,{0.03},64739,3.456,2.55,0.1012,1.25,0.46,1646,23,1638,37,1644,20,
30,,"p, sr, oz, 120, 105",108,60,40,0.550,{0.00},-,3.387,2.61,0.1006,1.67,-2.00,1635,31,1668,38,1648,24,
44,rim,"p, rp, CLb, 200, 100",45,27,16,0.597,{0.15},12840,3.475,2.48,0.1038,2.88,3.68,1693,53,1630,36,1649,30,
55,,"p, srp, CLd, oz, 150, 95",779,282,280,0.362,{0.01},184661,3.342,2.48,0.1012,0.69,-2.52,1646,13,1687,37,1651,170,
67,,"p, r, oz, 200, 125",397,566,179,1.426,{0.02},90521,3.381,1.96,0.1014,0.63,-1.24,1650,12,1670,29,1653,11,
83,,"r, sz, 120, 160",78,66,31,0.856,{0.04},47665,3.426,2.06,0.1017,1.47,0.28,1656,27,1651,30,1654,20,
48,rim?,"p, brp, oz, 160, 100",109,65,41,0.598,{0.05},35841,3.370,2.48,0.1008,1.87,-2.20,1639,35,1675,37,1656,25,
56,,"p, srp, oz, 180, 100",486,203,178,0.418,{0.02},81973,3.332,2.48,0.1013,0.88,-2.62,1649,16,1692,37,1656,200,
39,,"p, sr, oz, 135, 110",153,29,52,0.189,{0.06},32379,3.389,2.48,0.1015,1.50,-0.97,1651,28,1667,36,1657,22,
97,,"b, sr, CLd, 185, 130",438,198,156,0.452,{0.02},95530,3.471,1.96,0.1023,0.81,2.06,1666,15,1632,28,1659,180,
14,,"rp, oz, 185, 105",129,72,49,0.558,{0.07},27221,3.356,2.48,0.1015,1.44,-1.75,1652,27,1681,37,1662,22,
36,rim,"p, sr, sz, 180, 140",98,92,40,0.941,{0.05},36124,3.347,2.47,0.1008,2.01,-2.85,1638,37,1685,37,1662,26,
74,,"p, sr, oz, 140, 120",251,171,96,0.682,{0.02},111963,3.384,1.96,0.1023,0.83,-0.21,1666,15,1669,29,1666,14,
34,c,"p, rp, oz, 123, 85, thin CLb rim",160,76,59,0.477,{0.07},25751,3.362,2.48,0.1029,1.39,-0.12,1677,26,1678,37,1677,21,
28,,"p, srp, oz, 190, 125",265,60,93,0.227,{0.04},47994,3.325,2.49,0.1029,1.83,-1.09,1677,34,1695,37,1685,25,
72,,"p, srp, CLd, 145, 80",589,11,197,0.019,{0.05},38225,3.315,1.97,0.1064,0.58,2.27,1739,11,1700,29,1735,160,
94,,"p, rp, oz, 175, 100",464,216,180,0.466,{0.02},102400,3.198,1.96,0.1060,0.72,-1.31,1731,13,1754,30,1735,12,
41,,"b, srp, CLd, z, 140, 90",306,65,109,0.211,{0.04},43628,3.257,2.48,0.1066,1.06,0.89,1741,19,1726,38,1738,17,
discordant data,,,,,,,,,,,,,,,,,,,,
59,rim,"p, srp, CLb, 145, 85",14,24,3,1.707,2.60,720,6.197,2.70,0.0525,22.71,-232.45,306,480,964,24,-,-,
57,,"p, srp, oz, 140, 100",146,154,31,1.053,{0.04},42126,6.528,2.48,0.0720,2.50,6.85,986,51,919,21,-,-,
33,,"pb, srp, oz, 140, 105",456,252,99,0.553,{0.05},34061,5.705,2.47,0.0723,1.22,-4.74,994,25,1041,24,-,-,
13b,rim,"pb, srp, CLd, 145, 110",1091,349,133,0.320,2.67,701,9.128,2.58,0.0742,1.98,31.16,1047,40,670,16,-,-,
87,,"p, srp, CLb, z, 180, 120",24,6,4,0.235,{0.37},5083,6.747,1.96,0.0762,6.35,18.96,1099,127,891,16,-,-,
20,rim,"p, rp, oz, 240, 100, CLb c",166,10,32,0.059,{0.04},47420,5.692,2.59,0.0779,1.95,8.83,1144,39,1043,25,-,-,
89,,"pb, sp, z, 180, 160",1345,215,191,0.160,0.71,2638,7.861,2.00,0.0788,0.80,33.20,1168,16,772,15,-,-,
85,,"p, r, oz, 120, 90",132,56,31,0.427,{0.06},31838,5.138,1.98,0.0803,1.51,4.85,1205,30,1146,21,-,-,
95,,"srp, CLb, 165, 110",47,15,13,0.322,{0.14},13702,4.321,1.96,0.0893,2.24,4.82,1410,43,1342,24,-,-,
65,c,"p, rp, oz, 220, 100, CLb rim",477,231,157,0.484,{0.01},166161,3.731,2.05,0.0927,0.69,-3.24,1483,13,1531,28,-,-,
Supplementary Table Continued,,,,,,,,,,,,,,,,,,,,
spot,Description,,[U],[Th],[Pb],Th/U,f206%,206Pb,238U,±2s,207Pb,±2s,% disc,207Pb,±2s,206Pb,±2s,Conc. ,±2s,
#,,,ppm,ppm,ppm,meas,,204Pb,206Pb,%,206Pb,%,,206Pb,,238U,,age ,,
58,,"p, rp, oz, 118, 90",87,47,26,0.540,{0.16},11578,4.237,2.63,0.0940,2.41,9.44,1508,46,1366,32,-,-,
21b,rim,"p, rp, CLb, 200, 100",85,25,19,0.300,{9.95}*,188,5.370,2.53,0.0956,4.30,28.54,1540,81,1101,26,-,-,
47,,"p, sr, oz, 135, 120",213,89,78,0.416,{0.02},112593,3.324,2.49,0.0998,1.33,-4.59,1621,25,1695,37,-,-,
90,,"p, srp, oz, 150, 100",158,86,55,0.545,{0.07},25450,3.609,1.96,0.1008,1.24,3.80,1639,23,1577,27,-,-,
88,,"p, sp, z, 130, 100",427,105,141,0.247,{0.03},68941,3.550,1.96,0.1008,0.69,2.43,1640,13,1600,28,-,-,
3,,"b, srp, CLd, 140, 100",563,31,194,0.055,{0.12},15307,3.273,1.64,0.1130,0.69,7.02,1848,12,1719,25,-,-,
,,,,,,,,,,,,,,,,,,,,
"C63 Kinrovar Schist, Inishkea Division, Kinrovar",,,,,,,,,,,,,,,,,,,,
8c,met,"srp, z, 168, 96",182,1,15,0.006,0.48,3866,13.257,2.61,0.0549,5.18,-14.82808803,410,116,469,12,468,12,
9a,c,"p, sr, oz, 150, 115",32,20,8,0.604,1.43,1310,4.805,2.56,0.0770,7.83,-9.65,1120,156,1219,28,1215,28,
16,,"p, brp, oz, 210, 110",55,31,14,0.570,{0.25},7622,4.763,2.65,0.0840,3.77,5.51,1293,73,1228,30,1237,28,
12,c,"p, sr, oz, 152, 87, CLb rim",195,71,50,0.366,{0.05},38909,4.677,2.56,0.0811,1.91,-2.24,1224,38,1249,29,1240,23,
8b,c,"srp, oz, 168, 95",44,26,12,0.606,{0.38},4980,4.633,2.56,0.0800,4.03,-5.72,1198,79,1260,29,1252,27,
8a,c,"srp, oz, 168, 95",40,23,11,0.581,{0.17},11030,4.630,2.57,0.0814,4.95,-2.64,1231,97,1261,29,1258,28,
13,c,"p, r, oz, 125, 102, CLb rim",118,37,30,0.316,{0.16},11779,4.567,2.57,0.0819,2.84,-2.99,1243,56,1276,30,1269,26,
10,,"p, brp, oz, 205, 75",106,50,28,0.472,{0.10},17987,4.615,2.56,0.0839,2.50,2.14,1289,49,1264,29,1271,25,
3,,"p, sr, oz, 106, 94",45,30,14,0.678,{0.46},4066,4.255,2.56,0.0851,3.67,-3.67,1317,71,1361,31,1353,29,
11,rim,"sr, CLb, 197, 110, oz c",2,1,1,0.436,{5.78}*,324,4.046,2.70,0.0767,15.85,-30.97,1114,318,1424,35,1418,460,
14,c,"p, sr, oz, 84, 62, CLb rim ",477,246,158,0.515,{0.05},34512,3.745,2.57,0.0935,1.08,-1.85,1498,20,1526,35,1505,18,
2a,c,"p, rp, oz, 235, 60",123,136,51,1.106,{0.14},13387,3.420,2.56,0.0998,1.89,-2.27,1621,35,1654,37,1636,26,
6,c,"p, sr, oz, 96, 112, CLb rim",104,53,37,0.512,{0.49},3794,3.482,2.65,0.1021,2.06,2.10,1663,38,1628,38,1645,27,
4,c,"p, r, oz, 78, 67, CLb rim",144,89,54,0.617,{0.18},10409,3.385,2.56,0.1003,1.73,-2.37,1630,32,1669,38,1646,24,
discordant data,,,,,,,,,,,,,,,,,,,,
1b,rim,"p, brp, CLb, z, 265, 110",231,8,37,0.035,{0.21},8791,6.572,2.56,0.0734,2.18,10.92,1025,44,913,22,-,-,
9b,rim,"p, sr, z, 150, 115",64,2,12,0.030,{0.04},46509,6.005,2.56,0.0766,3.74,11.39,1110,75,993,24,-,-,
5,,"p, rp, oz, 240, 123",344,269,78,0.780,{0.1},19412,5.217,2.56,0.0801,1.75,5.74,1199,34,1130,27,-,-,
2b,rim,"p, rp, CLb, 235, 60",624,456,145,0.730,1.26,1484,4.991,2.60,0.0982,1.48,28.35,1590,28,1177,28,-,-,
1a,c,"p, brp, CLd, oz, 265, 110",216,192,81,0.888,{0.35},5327,3.593,2.56,0.1018,1.42,4.45,1657,26,1583,36,-,-,
7,,"srp, z, 153, 178",3,1,1,0.514,{1.76}*,1063,3.735,2.62,0.1194,13.19,24.08,1947,236,1529,36,-,-,
,,,,,,,,,,,,,,,,,,,,
"C67 Scotch Port Schist, Inishkea Division, Scotch Port",,,,,,,,,,,,,,,,,,,,
2b,rim,"p, srp, CLd, 143, 80",305,2,56,0.007,1.40,1337,5.891,2.56,0.0714,2.92,-4.67,969,60,1011,24,1005,22,
4b,"c, rep","p, srp, oz, 220, 110",299,37,59,0.122,15.26,123,5.683,2.81,0.0812,10.14,15.93,1225,199,1045,27,1047,27,
Supplementary Table Continued,,,,,,,,,,,,,,,,,,,,
spot,Description,,[U],[Th],[Pb],Th/U,f206%,206Pb,238U,±2s,207Pb,±2s,% disc,207Pb,±2s,206Pb,±2s,Conc. ,±2s,
#,,,ppm,ppm,ppm,meas,,204Pb,206Pb,%,206Pb,%,,206Pb,,238U,,age ,,
2a,c,"p, srp, oz, 143, 80",51,28,12,0.559,7.81,240,5.112,2.57,0.0779,12.05,-0.83,1143,240,1152,27,1152,27,
4a,c,"p, srp, oz, 220, 110",544,207,130,0.381,4.89,383,4.991,2.56,0.0797,5.89,1.18,1190,116,1177,28,1178,27,
6,,"sr, oz, 115, 92",228,116,57,0.511,{0.11},16995,4.948,2.56,0.0795,1.77,-0.23,1184,35,1187,28,1186,22,
1,,"p, srp, oz, 146, 87",84,29,21,0.339,{0.26},7328,4.690,2.56,0.0831,2.75,2.02,1272,54,1246,29,1252,26,
7,,"p, srp, oz, 193, 96",72,42,20,0.580,{0.15},12105,4.602,2.56,0.0821,3.05,-1.52,1249,60,1268,29,1264,26,
5b,rim,"p, srp, z, 143, 79",375,61,106,0.164,1.22,1528,4.016,2.77,0.0919,1.82,2.43,1465,35,1433,36,1450,25,
3,c,"p, sr, oz, 95, 87, thin CLb rim",522,66,155,0.126,{0.04},47652,3.816,2.59,0.0948,0.88,1.63,1525,17,1500,35,1520,15,
5a,c,"p, srp, oz, 143, 79",171,78,60,0.455,{0.09},19789,3.502,2.59,0.0998,1.89,0.12,1621,35,1619,37,1620,26,
,,,,,,,,,,,,,,,,,,,,
"Detrital data are sorted in order of increasing Concordia age (Conc. age); discordant data (where error ellipse does not intersect Concordia) are listed by increasing 207Pb/206Pb age. Concordia age errors are 2 sigma apart from those > 100 Ma, which are 95% confidence. All other errors are 2 sigma. % disc, % discordance, negative values are reverse discordant. f206% is the percentage of common 206Pb, estimated from measured 204Pb. f206% values are given in parentheses when no common Pb correction has been applied. Where applied the common Pb correction uses the present-day terrestrial common Pb estimate of Stacey & Kramers (1975).  Generally corrections were applied to data with 206Pb/204Pb ratios <3000, where this is not the case (asterisk after f206% value) the 204Pb count rate was indistinguishable from background values. Data in italics are omitted from zircon age distribution plots as they either represent replicate spots or an inherited component (only applies to detrital data).",,,,,,,,,,,,,,,,,,,,
,,,,,,,,,,,,,,,,,,,,
,,,,,,,,,,,,,,,,,,,,
,,,,,,,,,,,,,,,,,,,,
,,,,,,,,,,,,,,,,,,,,
,,,,,,,,,,,,,,,,,,,,
,,,,,,,,,,,,,,,,,,,,
,,,,,,,,,,,,,,,,,,,,
"Explanation for description: c = core, rep = replicate spot, met = post-depositional metamorphic overgrowth, b = brown, p = pink, pb = pinkish brown, r = rounded, sr = sub-rounded, bp = broken prism, brp = broken rounded prism, pr = prism, rp = rounded prism, sp = stubby prism, srp = sub-rounded prism, srap = sub-rounded acicular prism, z = zoned, oz = oscillatory-zoned, sz = sector-zoned, hoz = hint of oscillatory-zoning, CLb = CL-bright, CLd = CL-dark; numbers are length and width respectively in microns.",,,,,,,,,,,,,,,,,,,,
,,,,,,,,,,,,,,,,,,,,
,,,,,,,,,,,,,,,,,,,,
,,,,,,,,,,,,,,,,,,,,
,,,,,,,,,,,,,,,,,,,,
Notes,,,,,,,,,,,,,,,,,,,,
"C61A: The age of grain 21 is constrained by a core analysis (spot 21a), which yields a 207Pb/206Pb age of 1473 ± 21 Ma (and a Concordia age of 1487 ± 270 Ma). Discordant rim data (spot 21b) for this grain are interpreted as having experienced Pb loss from an age similar to the core, thus spot 21a is plotted in zircon age distribution plots. In the absence of corresponding rim analyses, the concordant core analyses for grains 5, 12, 34, 51 and 69 are also used.",,,,,,,,,,,,,,,,,,,,
,,,,,,,,,,,,,,,,,,,,
,,,,,,,,,,,,,,,,,,,,
"C63: Grains 4, 6, 12, 13 and 14 exhibit thin rims too narrow to analyse and thus, in the absence of such data, concordant core analyses are plotted  in zircon age distribution plots. The rim of grain 2 (spot 2b) yields a discordant analysis, due to Pb loss, and thus the core age (spot 2a, with a Concordia age of 1636 ± 26 Ma, similar to the 207Pb/206Pb age of the discordant rim) is plotted.",,,,,,,,,,,,,,,,,,,,
,,,,,,,,,,,,,,,,,,,,
,,,,,,,,,,,,,,,,,,,,
,,,,,,,,,,,,,,,,,,,,
References:,,,,,,,,,,,,,,,,,,,,
"Stacey, J.S. & Kramers, J.D. 1975. Approximation of terrestrial lead isotope evolution by a two-stage model. Earth and planetary Science Letters, 26, 207-221.",,,,,,,,,,,,,,,,,,,,
,,,,,,,,,,,,,,,,,,,,
,,,,,,,,,,,,,,,,,,,,
,,,,,,,,,,,,,,,,,,,,
,,,,,,,,,,,,,,,,,,,,
,,,,,,,,,,,,,,,,,,,,
,,,,,,,,,,,,,,,,,,,,
,,,,,,,,,,,,,,,,,,,,
,,,,,,,,,,,,,,,,,,,,
,,,,,,,,,,,,,,,,,,,,
,,,,,,,,,,,,,,,,,,,,
,,,,,,,,,,,,,,,,,,,,
,,,,,,,,,,,,,,,,,,,,
,,,,,,,,,,,,,,,,,,,,
,,,,,,,,,,,,,,,,,,,,
,,,,,,,,,,,,,,,,,,,,
,,,,,,,,,,,,,,,,,,,,
,,,,,,,,,,,,,,,,,,,,
,,,,,,,,,,,,,,,,,,,,
,,,,,,,,,,,,,,,,,,,,
,,,,,,,,,,,,,,,,,,,,
,,,,,,,,,,,,,,,,,,,,
,,,,,,,,,,,,,,,,,,,,
,,,,,,,,,,,,,,,,,,,,
,,,,,,,,,,,,,,,,,,,,
,,,,,,,,,,,,,,,,,,,,
,,,,,,,,,,,,,,,,,,,,
,,,,,,,,,,,,,,,,,,,,
,,,,,,,,,,,,,,,,,,,,
,,,,,,,,,,,,,,,,,,,,
,,,,,,,,,,,,,,,,,,,,
,,,,,,,,,,,,,,,,,,,,
,,,,,,,,,,,,,,,,,,,,
